# Supplementary material for: Considerations for evaluating the practical utility of machine learning in suicide risk estimation: the role of cost and equity
Source: Research Square preprint supplement (doi:10.21203/rs.3.rs-8216032/v1), 2025-12-30
Supplement: Supplementary file 1 [file 72e12b4c1ac6c314538ac10a.docx]

**SUPPLEMENTAL TABLES**

**Table S1**. Hyperparameter settings as found by the truncated grid search
procedures of each machine learning model.

| **Cohort** | **Model** | **Parameter1** | **Parameter2** | **Parameter3** | **AUROC** | **AUPRC** | **F1** | **Sens.** | **PPV** |
| --- | --- | --- | --- | --- | --- | --- | --- | --- | --- |
| Decedents | Elastic net | α=0.1 | λ=AUROC | - | 0.823 | 0.231 | 0.111 | 0.061 | 0.572 |
| MLP | η=0.1 | drop=0.02 | batch=4096 | 0.807 | 0.227 | 0.188 | 0.750 | 0.107 |
| Random forest | depth=150 | trees=200 | classwgt=2 | 0.791 | 0.205 | 0.232 | 0.196 | 0.289 |
| XGBoost | depth=5 | trees=200 | η=0.1 | 0.827 | 0.238 | 0.114 | 0.063 | 0.620 |
| HSCRC | Elastic net | α=0.5 | λ=min.err | - | 0.836 | 0.152 | 0.141 | 0.078 | 0.772 |
| MLP | η=0.02 | drop=0.5 | batch=8192 | 0.846 | 0.226 | 0.031 | 0.698 | 0.016 |
| Random forest | depth=100 | trees=200 | classwgt=2 | 0.772 | 0.067 | 0.059 | 0.375 | 0.032 |
| XGBoost | depth=5 | trees=200 | η=0.75 | 0.915 | 0.672 | 0.694 | 0.542 | 0.967 |
| MHCC | Elastic net | α=0.6 | λ=min.err | - | 0.867 | 0.358 | 0.425 | 0.274 | 0.943 |
| MLP | η=0.1 | drop=0.1 | batch=8192 | 0.929 | 0.561 | 0.093 | 0.782 | 0.050 |
| Random forest | depth=100 | trees=200 | classwgt=2 | 0.776 | 0.270 | 0.129 | 0.439 | 0.075 |
| XGBoost | depth=10 | trees=200 | η=1.25 | 0.863 | 0.557 | 0.617 | 0.462 | 0.927 |

**Table S2**. Rescaled variable importance score.

| **Cohort** | **Coefficient** | **Elastic net** | **Logistic regression** | **Random forest** | **XGBoost** |
| --- | --- | --- | --- | --- | --- |
| Decedents | Decedent age | 0.028 (0.024:0.032) | 0.998 (0.995:1.000) | 0.998 (0.995:1.000) | 0.997 (0.994:1.000) |
| Male | 0.849 (0.828:0.871) | 0.993 (0.990:0.996) | 0.962 (0.946:0.978) | 0.986 (0.975:0.996) |
| SI & SA* | 0.911 (0.886:0.935) | 0.983 (0.973:0.992) | 0.965 (0.948:0.982) | 0.979 (0.964:0.995) |
| Depressive | 0.625 (0.535:0.714) | 0.961 (0.940:0.983) | 0.836 (0.787:0.885) | 0.925 (0.899:0.950) |
| IP Admit 12mos** | 0.478 (0.341:0.614) | 0.883 (0.783:0.983) | 0.919 (0.898:0.940) | 0.875 (0.816:0.934) |
| HSCRC | Decedent age | 0.014 (0.008:0.021) | 0.818 (0.769:0.867) | 0.921 (0.913:0.929) | 0.996 (0.992:1.000) |
| Male | 0.949 (0.942:0.956) | 0.997 (0.994:1.000) | 0.975 (0.969:0.982) | 0.976 (0.968:0.983) |
| SI & SA* | 0.894 (0.847:0.941) | 0.893 (0.854:0.932) | 0.942 (0.921:0.962) | 0.924 (0.900:0.949) |
| Depressive | 0.731 (0.698:0.763) | 0.925 (0.900:0.950) | 0.985 (0.974:0.996) | 0.955 (0.937:0.972) |
| IP Admit 12mos** | 0.718 (0.678:0.758) | 0.917 (0.888:0.946) | 0.803 (0.737:0.869) | 0.836 (0.797:0.876) |
| MHCC | Decedent age | 0.037 (0.031:0.043) | 0.974 (0.970:0.978) | 0.936 (0.929:0.944) | 0.996 (0.991:1.000) |
| Male | 0.827 (0.814:0.840) | 0.980 (0.977:0.983) | 0.973 (0.967:0.979) | 0.961 (0.956:0.966) |
| SI & SA* | 0.980 (0.974:0.986) | 0.961 (0.943:0.979) | 0.958 (0.944:0.971) | 0.970 (0.964:0.975) |
| Depressive | 0.754 (0.720:0.789) | 0.954 (0.939:0.969) | 0.983 (0.976:0.990) | 0.921 (0.900:0.942) |
| IP Admit 12mos** | 0.757 (0.721:0.793) | 0.935 (0.924:0.947) | 0.945 (0.933:0.956) | 0.784 (0.704:0.864) |

* SI & SA: Suicide ideation or suicide attempt
** IP Admit 12mos: Inpatient admission in the last 12 months

**Table S3**. Average cross-validated equal odds difference in predicted suicide death by subpopulation.

| **Cohort** | **Protected group** | **Elastic net** | **Logistic regression** | **MLP** | **Random forest** | **XGBoost** |
| --- | --- | --- | --- | --- | --- | --- |
| **Decedents** | 1+ outpatient encounter | -0.067 | -0.073 | 0.077 | 0.248 | -0.047 |
| 1+ social need | -0.154 | -0.161 | 0.049 | -0.028 | -0.128 |
| Age less than 65 | -0.064 | -0.077 | -0.24 | -0.48 | -0.066 |
| Caucasian race | -0.001 | 0.006 | 0.04 | 0.141 | 0.013 |
| Male sex | 0.034 | 0.036 | -0.114 | -0.07 | 0.02 |
| Psychiatric patient | -0.121 | -0.141 | 0.037 | -0.02 | -0.114 |
| **HSCRC** | 1+ outpatient encounter | -0.147 | -0.151 | -0.393 | -0.552 | -0.138 |
| 1+ social need | -0.212 | -0.207 | -0.071 | -0.397 | -0.168 |
| Age less than 65 | 0.036 | 0.037 | 0.001 | 0.06 | -0.203 |
| Caucasian race | -0.08 | -0.086 | -0.01 | -0.082 | 0.001 |
| Male sex | 0.022 | 0.023 | -0.129 | 0.026 | -0.022 |
| Psychiatric patient | -0.227 | -0.231 | -0.105 | -0.554 | -0.145 |
| **MHCC** | 1+ outpatient encounter | -0.309 | -0.317 | -0.575 | -0.463 | -0.283 |
| 1+ social need | -0.278 | -0.259 | -0.035 | -0.274 | -0.153 |
| Age less than 65 | -0.159 | -0.142 | 0.027 | 0.127 | -0.115 |
| Caucasian race | -0.007 | -0.011 | 0.007 | -0.079 | 0.001 |
| Male sex | 0.062 | 0.053 | -0.075 | 0.014 | -0.032 |
| Psychiatric patient | -0.36 | -0.35 | -0.158 | -0.457 | -0.22 |

**Table S4**. Sensitivity analysis on equal odds difference.

| **Decedents** |  |  |  | **Classification metrics** | | | | **Equal odds difference** | | | | | |
| --- | --- | --- | --- | --- | --- | --- | --- | --- | --- | --- | --- | --- | --- |
| Algorithm | **%tile** | **AUROC** | **AUPRC** | **Acc.** | **Sens.** | **Spec.** | **PPV** | **Age less than 65** | **Male sex** | **Caucasian race** | **Psychiatric patient** | **1+ outpatient encounter** | **1+ social need** |
| Elastic net | 90th | 0.837 | 0.251 | 0.899 | 0.488 | 0.917 | 0.200 | -0.398 | -0.116 | 0.042 | -0.193 | 0 | -0.089 |
| 99th | 0.959 | 0.118 | 0.995 | 0.481 | -0.107 | 0.043 | -0.005 | -0.201 | -0.102 | -0.191 |
| 99.9th | 0.960 | 0.019 | 0.999 | 0.750 | -0.015 | 0.007 | -0.007 | -0.033 | -0.02 | -0.049 |
| Logistic regression | 90th | 0.833 | 0.249 | 0.899 | 0.484 | 0.916 | 0.198 | -0.384 | -0.122 | 0.045 | -0.178 | -0.002 | -0.074 |
| 99th | 0.959 | 0.118 | 0.995 | 0.483 | -0.105 | 0.049 | -0.003 | -0.2 | -0.103 | -0.197 |
| 99.9th | 0.960 | 0.019 | 0.999 | 0.770 | -0.013 | 0.013 | -0.005 | -0.034 | -0.021 | -0.038 |
| MLP | 90th | 0.746 | 0.145 | 0.899 | 0.357 | 0.922 | 0.162 | -0.249 | -0.019 | 0.051 | -0.13 | 0.012 | -0.064 |
| 99th | 0.958 | 0.044 | 0.997 | 0.357 | -0.033 | 0.034 | 0.012 | -0.07 | -0.022 | -0.064 |
| 99.9th | 0.959 | 0.013 | 0.999 | 0.547 | -0.01 | 0.01 | 0.006 | -0.023 | -0.015 | -0.035 |
| Random forest | 90th | 0.808 | 0.196 | 0.896 | 0.439 | 0.916 | 0.182 | -0.502 | -0.058 | 0.158 | -0.005 | 0.26 | -0.027 |
| 99th | 0.956 | 0.086 | 0.993 | 0.356 | -0.107 | -0.069 | 0.048 | -0.035 | -0.068 | -0.019 |
| 99.9th | 0.959 | 0.014 | 0.999 | 0.643 | -0.018 | -0.018 | 0.001 | -0.019 | -0.015 | -0.004 |
| XGBoost | 90th | 0.840 | 0.251 | 0.899 | 0.484 | 0.916 | 0.198 | -0.427 | -0.03 | 0.127 | -0.122 | 0.138 | -0.05 |
| 99th | 0.959 | 0.117 | 0.995 | 0.477 | -0.109 | 0.037 | 0.013 | -0.181 | -0.035 | -0.176 |
| 99.9th | 0.960 | 0.019 | 0.999 | 0.750 | -0.015 | 0.011 | 0.004 | -0.033 | -0.02 | -0.039 |
| **HSCRC** |  |  |  | **Classification metrics** | | | | **Equal odds difference** | | | | | |
| Algorithm | **%tile** | **AUROC** | **AUPRC** | **Acc.** | **Sens.** | **Spec.** | **PPV** | **Age less than 65** | **Male sex** | **Caucasian race** | **Psychiatric patient** | **1+ outpatient encounter** | **1+ social need** |
| Elastic net | 90th | 0.914 | 0.249 | 0.901 | 0.771 | 0.901 | 0.016 | 0.053 | -0.148 | -0.086 | -0.275 | -0.735 | -0.203 |
| 99th | 0.990 | 0.456 | 0.991 | 0.094 | 0.086 | -0.037 | -0.086 | -0.441 | -0.472 | -0.373 |
| 99.9th | 0.998 | 0.213 | 0.999 | 0.438 | 0.078 | 0.051 | -0.108 | -0.318 | -0.226 | -0.309 |
| Logistic regression | 90th | 0.913 | 0.247 | 0.901 | 0.766 | 0.901 | 0.016 | 0.049 | -0.159 | -0.083 | -0.265 | -0.724 | -0.206 |
| 99th | 0.990 | 0.451 | 0.991 | 0.093 | 0.096 | -0.045 | -0.095 | -0.433 | -0.472 | -0.363 |
| 99.9th | 0.998 | 0.210 | 0.999 | 0.432 | 0.082 | 0.048 | -0.104 | -0.307 | -0.223 | -0.299 |
| MLP | 90th | 0.666 | 0.068 | 0.900 | 0.506 | 0.901 | 0.010 | -0.013 | -0.155 | -0.002 | -0.076 | -0.337 | -0.045 |
| 99th | 0.992 | 0.197 | 0.994 | 0.061 | 0.041 | -0.031 | -0.04 | -0.109 | -0.196 | -0.067 |
| 99.9th | 0.997 | 0.101 | 0.999 | 0.208 | 0.035 | -0.007 | -0.029 | -0.069 | -0.11 | -0.069 |
| Random forest | 90th | 0.891 | 0.116 | 0.903 | 0.709 | 0.903 | 0.015 | 0.064 | 0.051 | -0.109 | -0.487 | -0.667 | -0.31 |
| 99th | 0.990 | 0.414 | 0.991 | 0.085 | 0.051 | -0.008 | -0.106 | -0.455 | -0.412 | -0.401 |
| 99.9th | 0.998 | 0.128 | 0.999 | 0.287 | 0.045 | -0.062 | -0.032 | -0.184 | -0.139 | -0.142 |
| XGBoost | 90th | 0.949 | 0.667 | 0.902 | 0.871 | 0.902 | 0.018 | -0.098 | -0.062 | -0.018 | -0.073 | -0.086 | -0.043 |
| 99th | 0.991 | 0.752 | 0.992 | 0.155 | -0.134 | -0.022 | -0.022 | -0.121 | -0.035 | -0.114 |
| 99.9th | 0.999 | 0.467 | 0.9999 | 0.961 | -0.191 | -0.051 | -0.009 | -0.165 | -0.211 | -0.176 |
| **MHCC** |  |  |  | **Classification metrics** | | | | **Equal odds difference** | | | | | |
| Algorithm | **%tile** | **AUROC** | **AUPRC** | **Acc.** | **Sens.** | **Spec.** | **PPV** | **Age less than 65** | **Male sex** | **Caucasian race** | **Psychiatric patient** | **1+ outpatient encounter** | **1+ social need** |
| Elastic net | 90th | 0.914 | 0.498 | 0.901 | 0.817 | 0.901 | 0.017 | 0.07 | -0.08 | -0.039 | -0.206 | -0.699 | -0.082 |
| 99th | 0.991 | 0.634 | 0.991 | 0.130 | 0.002 | -0.077 | -0.048 | -0.272 | -0.566 | -0.171 |
| 99.9th | 0.999 | 0.395 | 0.999 | 0.810 | -0.14 | 0.055 | -0.01 | -0.364 | -0.338 | -0.276 |
| Logistic regression | 90th | 0.922 | 0.507 | 0.901 | 0.8097 | 0.901 | 0.017 | 0.068 | -0.083 | -0.032 | -0.192 | -0.691 | -0.057 |
| 99th | 0.991 | 0.630 | 0.991 | 0.129 | 0.001 | -0.078 | -0.042 | -0.26 | -0.562 | -0.146 |
| 99.9th | 0.999 | 0.391 | 0.999 | 0.803 | -0.124 | 0.048 | -0.013 | -0.349 | -0.341 | -0.263 |
| MLP | 90th | 0.882 | 0.445 | 0.901 | 0.767 | 0.901 | 0.016 | 0.03 | -0.076 | 0.007 | -0.157 | -0.576 | -0.033 |
| 99th | 0.990 | 0.598 | 0.991 | 0.122 | 0 | -0.045 | -0.031 | -0.245 | -0.479 | -0.122 |
| 99.9th | 0.998 | 0.373 | 0.999 | 0.766 | -0.107 | 0.062 | -0.012 | -0.312 | -0.282 | -0.209 |
| Random forest | 90th | 0.914 | 0.346 | 0.902 | 0.814 | 0.902 | 0.017 | 0.091 | 0.024 | -0.039 | -0.31 | -0.696 | -0.161 |
| 99th | 0.990 | 0.514 | 0.991 | 0.106 | 0.088 | 0.015 | -0.082 | -0.483 | -0.388 | -0.285 |
| 99.9th | 0.998 | 0.277 | 0.999 | 0.579 | -0.045 | -0.018 | -0.044 | -0.357 | -0.207 | -0.202 |
| XGBoost | 90th | 0.886 | 0.558 | 0.901 | 0.754 | 0.901 | 0.015 | -0.094 | -0.068 | 0.018 | -0.108 | -0.278 | -0.058 |
| 99th | 0.991 | 0.641 | 0.991 | 0.132 | -0.096 | -0.052 | 0.005 | -0.169 | -0.347 | -0.098 |
| 99.9th | 0.999 | 0.441 | 0.999 | 0.906 | -0.129 | -0.026 | 0.014 | -0.229 | -0.262 | -0.164 |

**SUPPLEMENTAL FIGURE LEGEND**

**Figure S1A**. Top variable importance ranking for decedents cohort.

**Figure S1B**. Top variable importance ranking for HSCRC cohort.

**Figure S1C**. Top variable importance ranking for MHCC cohort.

**Figure S2**. Overall disparate impact of suicide death across subpopulations of interest.
